# Supplementary material for: Elevated IL-6 and Tumor Necrosis Factor-α in Immune Checkpoint Inhibitor Myocarditis
Source: MDPI journal article supplement (doi:10.3390/diseases12050088), 2024-05-03
Supplement: s1 [file s1]

Supplement S1- Certainty Adjudication Criteria as per criteria from Bonaca et al<sup>3</sup>.

1. Definite myocarditis: the presence of at least one of the following:
  - a. Pathology consistent with myocarditis.
  - b. Diagnostic CMR, the clinical syndrome of myocarditis, and positive biomarker or ECG.
  - c. Echocardiography with wall motion abnormality, the clinical syndrome of myocarditis, positive biomarker, positive ECG, and negative angiography for CAD.
2. Probable myocarditis:
  - a. Diagnostic CMR without clinical syndrome of myocarditis, positive ECG, or positive biomarker, OR
  - b. Suggestive CMR with one of the following:
    - i. Clinical syndrome of myocarditis.
    - ii. Positive ECG.
    - iii. Positive biomarker, OR
  - c. Echocardiography with wall motion abnormality and the clinical syndrome of myocarditis with either positive ECG or biomarker, OR
  - d. Clinical syndrome of myocarditis with positron emission tomography scan evidence and no alternative diagnosis.
3. Possible myocarditis:
  - a. Suggestive CMR without clinical syndrome of myocarditis, positive ECG, or positive biomarker, OR
  - b. Echocardiography with wall motion abnormality and the clinical syndrome of myocarditis or positive ECG, OR
  - c. Elevated biomarker with the clinical syndrome of myocarditis or positive ECG and no alternative diagnosis.

Supplement S2- TNF- $\alpha$  and IL-6 levels compared to histologic grade of myocarditis

|                                                                        | No biopsy               | Grade 0 <sup>†</sup>    | Grade 1A <sup>†</sup> | Grade 1B <sup>†</sup>  | Grade 2 <sup>†</sup>    | p-value* |
|------------------------------------------------------------------------|-------------------------|-------------------------|-----------------------|------------------------|-------------------------|----------|
| TNF- $\alpha$ >22pg/mL, % (Positive/total)                             | 64<br>(23/36)           | 100<br>(2/2)            | 67<br>(4/6)           | 75<br>(3/4)            | 71<br>(12/17)           | 0.825    |
| TNF- $\alpha$ level if positive, median [IQR] (number of observations) | 36<br>[28,54]<br>(23)   | 77.5<br>[38,117]<br>(2) | 92<br>[33,182]<br>(4) | 75<br>[34, 176]<br>(3) | 35<br>[31.5,53]<br>(12) | 0.306    |
| IL-6 >5 pg/mL percentage (Positive/total)                              | 72<br>(26/36)           | 50<br>(1/2)             | 83<br>(5/6)           | 50<br>(2/4)            | 82<br>(14/17)           | 0.429    |
| IL-6 level if positive Median [IQR] (number of observations)           | 41.5<br>[20,97]<br>(26) | 39<br>[39,39]<br>(1)    | 21<br>[20,23]<br>(5)  | 10<br>[8,12]<br>(2)    | 30<br>[16,116]<br>(14)  | 0.194    |

TNF- $\alpha$ : Tumor Necrosis Factor  $\alpha$ , IL-6: Interleukin-6, IQR: Interquartile Range

\* Calculated with  $\chi^2$  test or Kruskal Wallis

<sup>†</sup> Grading as per histologic criteria previously published<sup>5</sup>

**Supplement S3. Outcomes in Patients with Peak TNF- $\alpha$ >22 pg/mL stratified by sex.**

| <b>Outcomes</b>                | <b>Females<br/>Peak TNF-<math>\alpha</math> &gt; 22 (pg/mL)<br/>(n= 12 /18)</b> | <b>Males<br/>Peak TNF-<math>\alpha</math> &gt; 22 (pg/mL)<br/>(n= 33 /47)</b> | <b>P-value</b> |
|--------------------------------|---------------------------------------------------------------------------------|-------------------------------------------------------------------------------|----------------|
| <b>90-day mortality, n (%)</b> | 3/12 (25%)                                                                      | 11/33 (33.3%)                                                                 | 0.59           |
| <b>MACE, n (%)</b>             | <b>0</b>                                                                        | 6/33 (18.2%)                                                                  | 0.11           |
|                                | -                                                                               | 3 (9.4%)                                                                      |                |
| <b>Heart failure</b>           | -                                                                               | 1 (3.1%)                                                                      |                |
| <b>Pulmonary embolism</b>      | -                                                                               | 2 (6.3%)                                                                      |                |
| <b>Sudden cardiac death</b>    | -                                                                               | 0                                                                             |                |
| <b>Arterial thrombosis</b>     | -                                                                               | 3 (9.4%)                                                                      |                |
| <b>Arrhythmia</b>              |                                                                                 |                                                                               |                |

**Supplement S4. Outcomes in Patients with Peak IL-6 > 5 pg/mL stratified by sex.**

| <b>Outcomes</b>                | <b>Females<br/>Peak IL-6 &gt;5 (pg/mL)<br/>(n=14/18)</b> | <b>Males<br/>Peak IL-6 &gt;5 (pg/mL)<br/>(n=31/47)</b> | <b>P-value</b> |
|--------------------------------|----------------------------------------------------------|--------------------------------------------------------|----------------|
| <b>90-day mortality, n (%)</b> | 3/15 (20%)                                               | 10/33 (30.3%)                                          | 0.46           |
| <b>MACE, n (%)</b>             | <b>0</b>                                                 | 4/31 (12.9%)                                           | 0.29           |
|                                | -                                                        | 2 (6.5%)                                               |                |
| <b>Heart failure</b>           | -                                                        | 0                                                      |                |
| <b>Pulmonary embolism</b>      | -                                                        | 2 (6.5%)                                               |                |
| <b>Sudden cardiac death</b>    | -                                                        | 0                                                      |                |
| <b>Arterial thrombosis</b>     | -                                                        | 3 (9.7%)                                               |                |
| <b>Arrhythmia</b>              |                                                          |                                                        |                |
